# Supplementary material for: Evaluation of non-invasive continuous physiological monitoring devices for neonates in Nairobi, Kenya: a research protocol
Source: PubMed Central journal article supplement (PMC7200030; doi:10.1136/bmjopen-2019-035184), 2020-04-12
Supplement: bmjopen-2019-035184supp001.pdf [file bmjopen-2019-035184supp001.pdf]

## 1 Appendix I: Schedule of study procedures and evaluations

| Activity                                                | Screening | Enrollment | Observation | Discharge |
|---------------------------------------------------------|-----------|------------|-------------|-----------|
| Eligibility assessment                                  | X         |            |             |           |
| Informed consent and comprehension checklist            | X         |            |             |           |
| Assign participant ID                                   | X         |            |             |           |
| Demographics                                            | X         | X          |             |           |
| Medical history                                         |           | X          | X           | X         |
| Maternal pregnancy history                              |           | X          |             |           |
| Medications use                                         |           | X          |             |           |
| Placement of reference and/or investigational device(s) |           | X          | X           |           |
| Collection of vital signs                               |           | X          | X           | X         |
| Video tape recording and/or photographs                 |           |            | X           |           |

|                                                       |  |  |   |   |
|-------------------------------------------------------|--|--|---|---|
| Track clinical care and non-study activities          |  |  | X | X |
| Safety assessment                                     |  |  | X |   |
| End of study questions                                |  |  |   | X |
| Removal of investigational and/or reference device(s) |  |  |   | X |

2
